# Supplementary material for: How do electron localization functions describe π-electron delocalization?
Source: Royal Society of Chemistry journal article supplement (doi:10.1039/c1cp21055f), 2011-01-01
Supplement: c1cp21055f.pdf [file c1cp21055f.pdf]

## Supporting Information for:

How do electron localization functions describe  $\pi$ -electron delocalization?

Stephan N. Steinmann,<sup>1</sup> Yirong Mo<sup>2</sup> and Clemence Corminboeuf<sup>1\*</sup>

<sup>1</sup>Laboratory for Computational Molecular Design, Institut des Sciences et Ingénierie Chimiques, Ecole Polytechnique Fédérale de Lausanne, CH-1015 Lausanne, Switzerland

<sup>2</sup>Department of Chemistry, Western Michigan University Kalamazoo, MI 49008-3842

\* Corresponding author: clemence.corminboeuf@epfl.ch

To be published in *Physical Chemistry Chemical Physics*

This supporting information was prepared on Mai 25, 2011 and contains 8 page.

Figure S1 ELF isosurfaces (ELF=0.8) for benzene (1) and borazine (2). Boron and nitrogen atoms are in green and blue, respectively. From left to right: total,  $\sigma$  and  $\pi$  electrons. Upper row: Canonical, lower row: BLW.

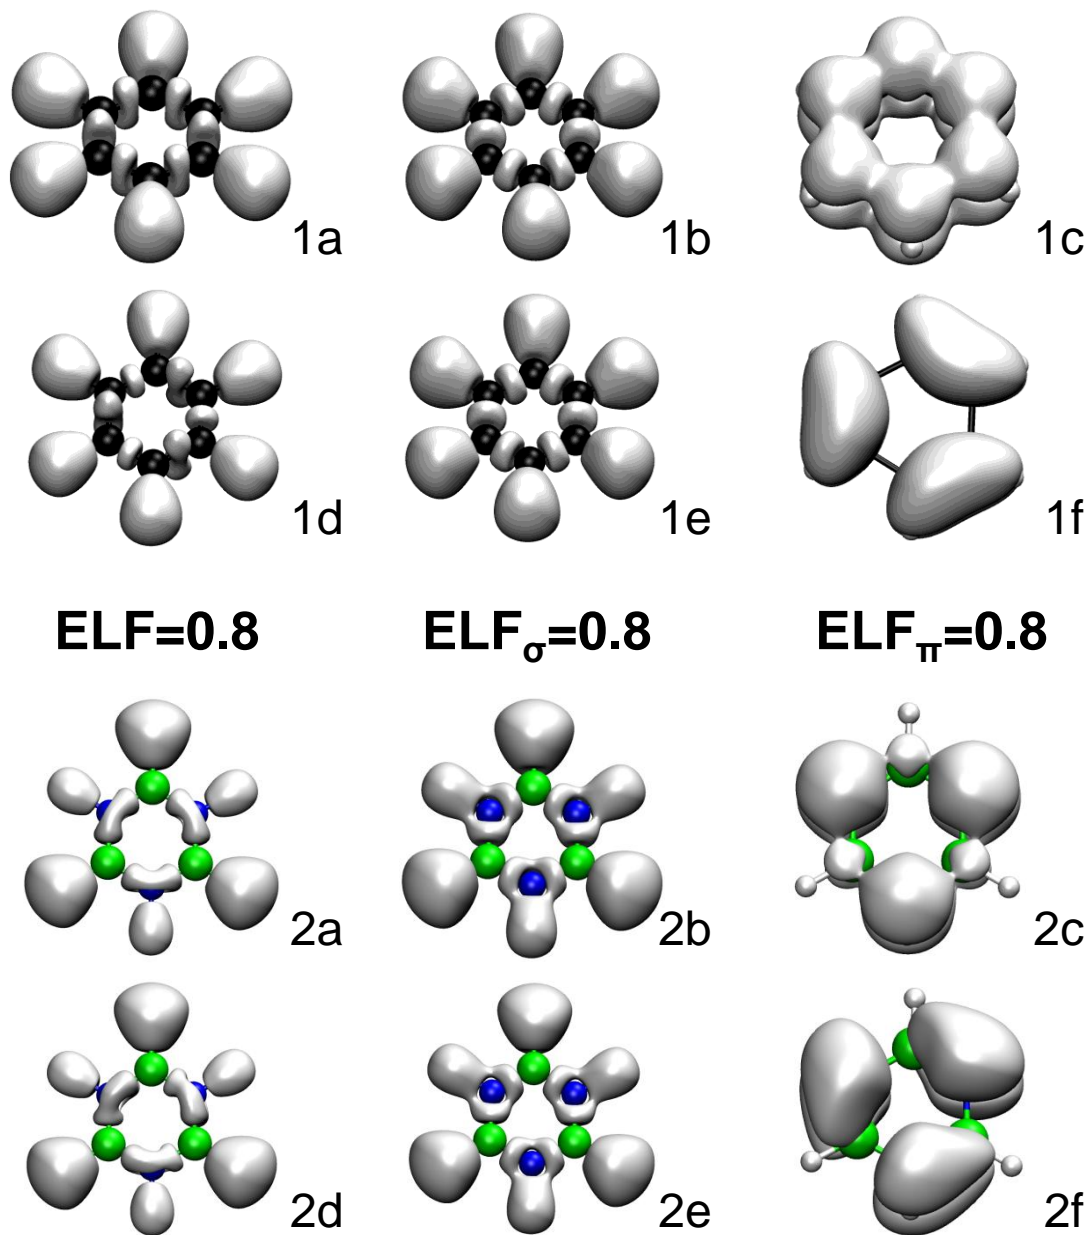

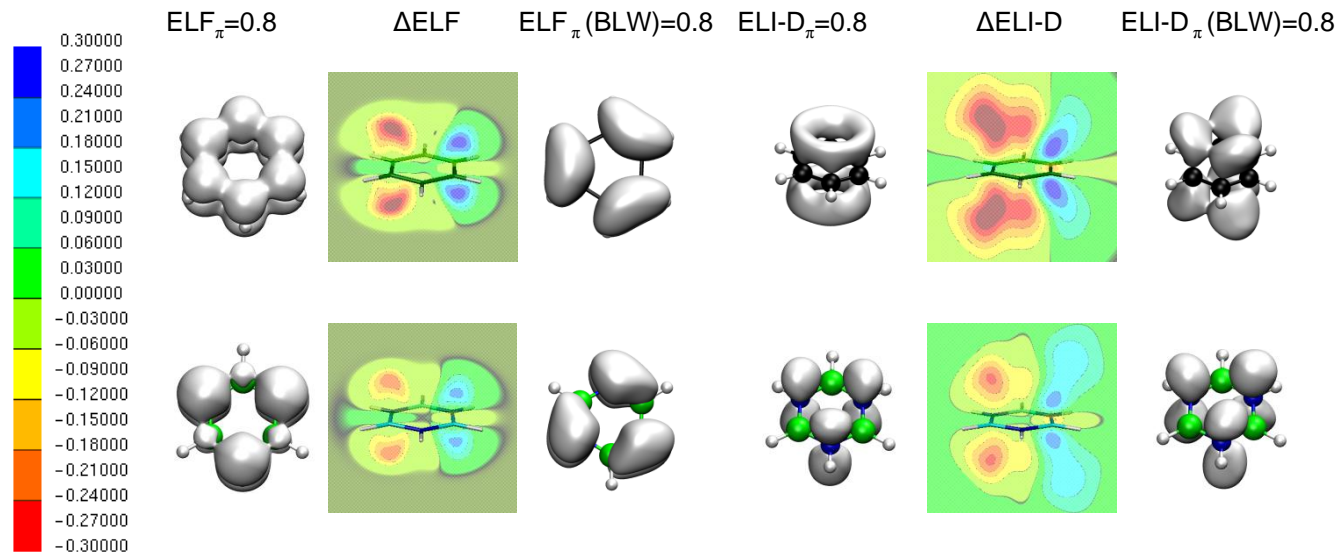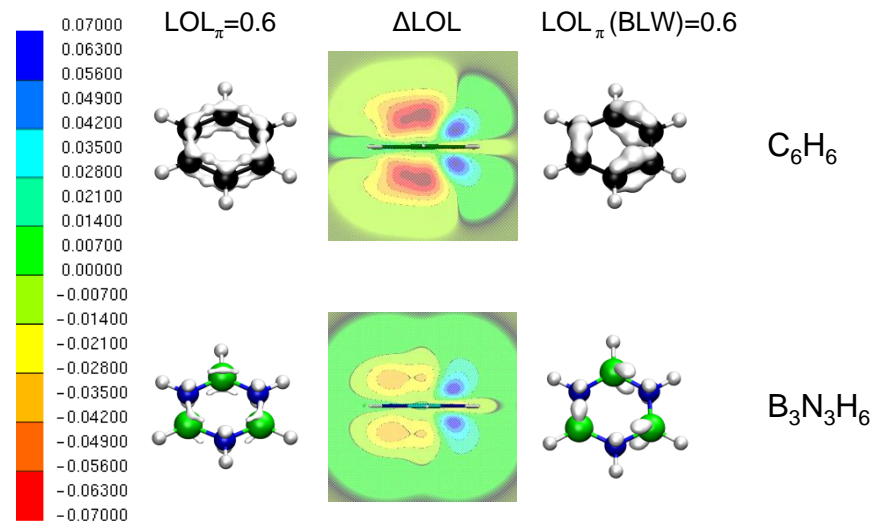

**Figure S2 ELF, ELI-D and LOL differences between canonical and BLW electronic structure for benzene and borazine. Isosurfaces of canonical (1<sup>st</sup> column) and BLW (3<sup>rd</sup> column)  $\pi$ -contributions at a value of 0.8, 0.8 and 0.6 for ELF, ELI-D and LOL, respectively. Profiles perpendicular to the  $\pi$ -system through the single and double bond (2<sup>nd</sup> column). Blue/red indicates regions of higher/lower values in the canonical case than in BLW.**

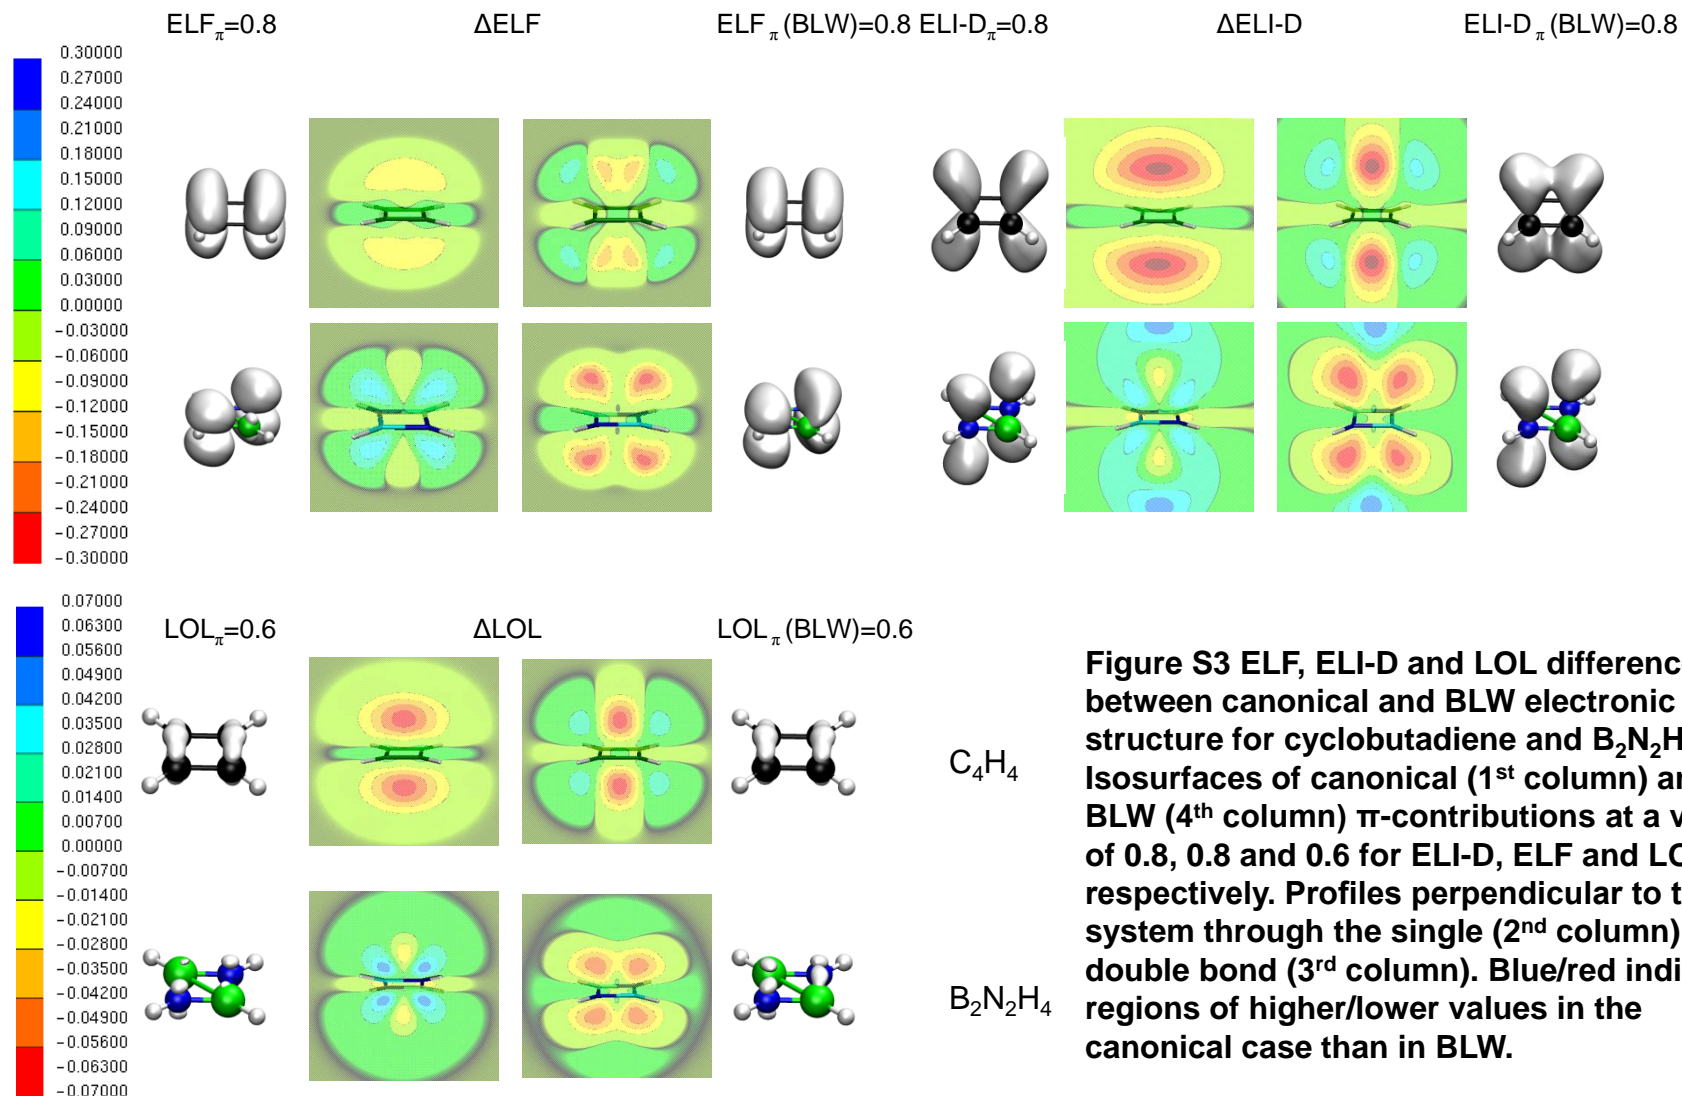

**Figure S3 ELF, ELI-D and LOL differences between canonical and BLW electronic structure for cyclobutadiene and B<sub>2</sub>N<sub>2</sub>H<sub>4</sub>. Isosurfaces of canonical (1<sup>st</sup> column) and BLW (4<sup>th</sup> column) π-contributions at a value of 0.8, 0.8 and 0.6 for ELI-D, ELF and LOL, respectively. Profiles perpendicular to the π-system through the single (2<sup>nd</sup> column) and double bond (3<sup>rd</sup> column). Blue/red indicates regions of higher/lower values in the canonical case than in BLW.**

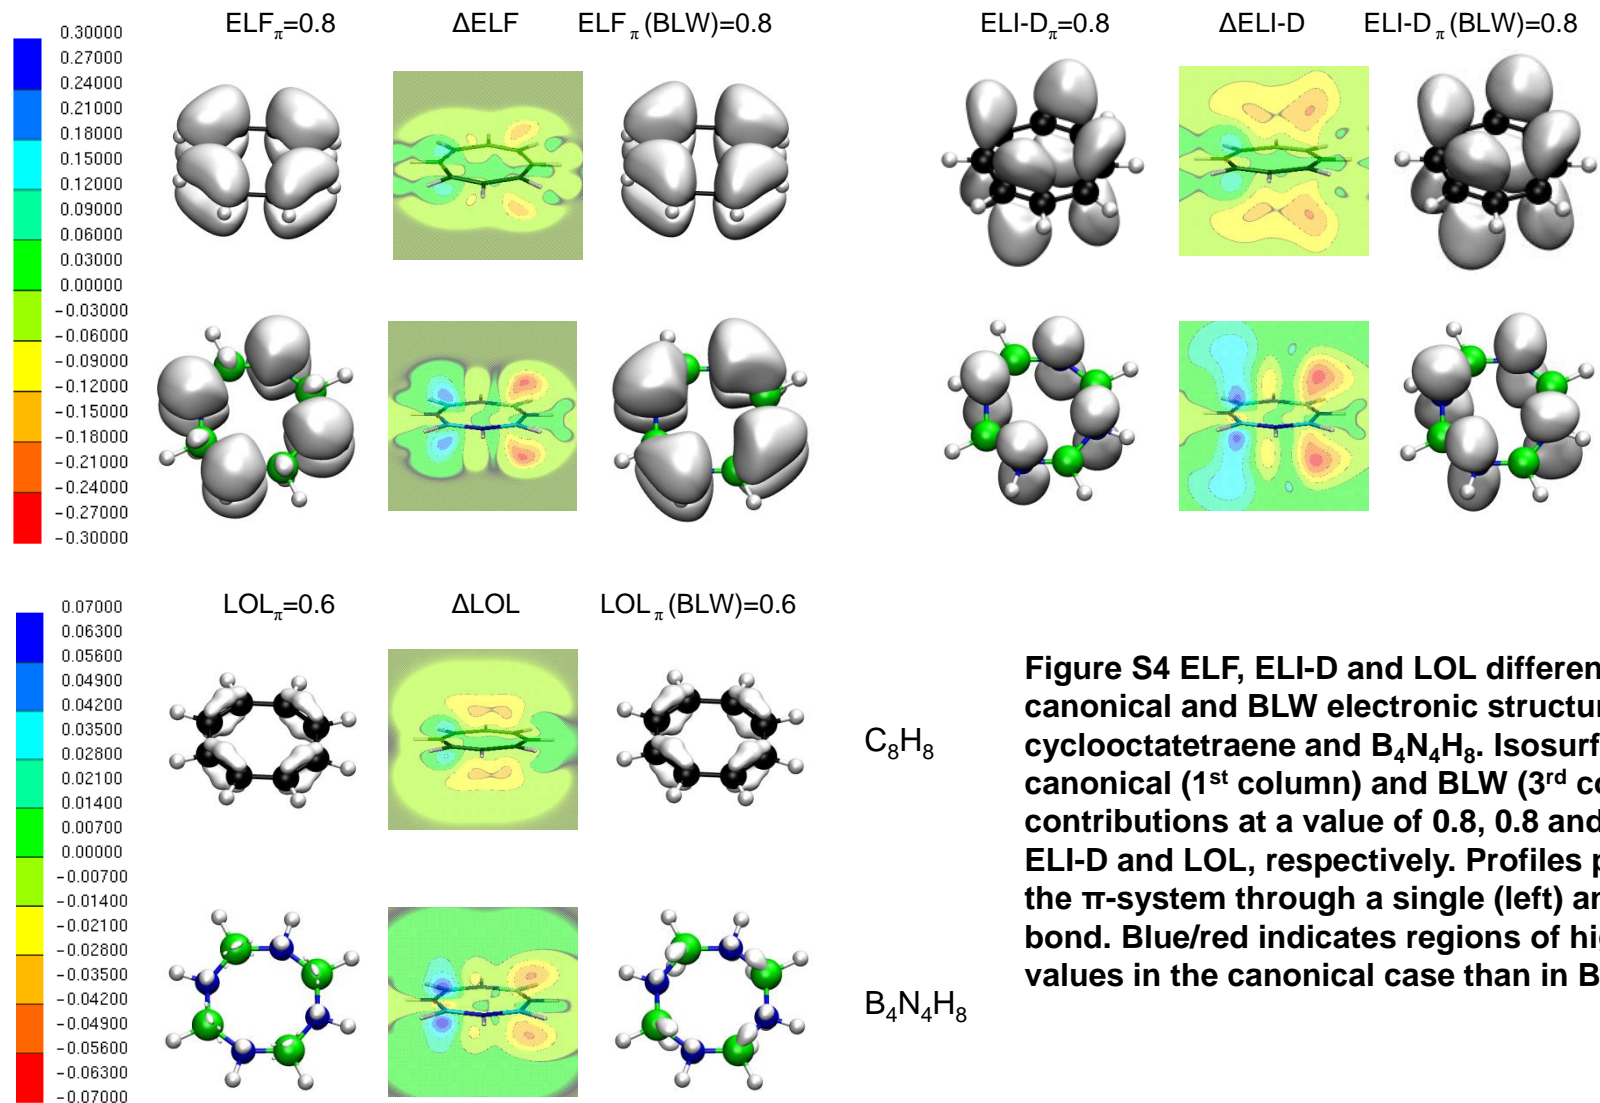

**Figure S4 ELF, ELI-D and LOL differences between canonical and BLW electronic structure for cyclooctatetraene and  $B_4N_4H_8$ . Isosurfaces of canonical (1<sup>st</sup> column) and BLW (3<sup>rd</sup> column)  $\pi$ -contributions at a value of 0.8, 0.8 and 0.6 for ELF, ELI-D and LOL, respectively. Profiles perpendicular to the  $\pi$ -system through a single (left) and double (right) bond. Blue/red indicates regions of higher/lower values in the canonical case than in BLW.**





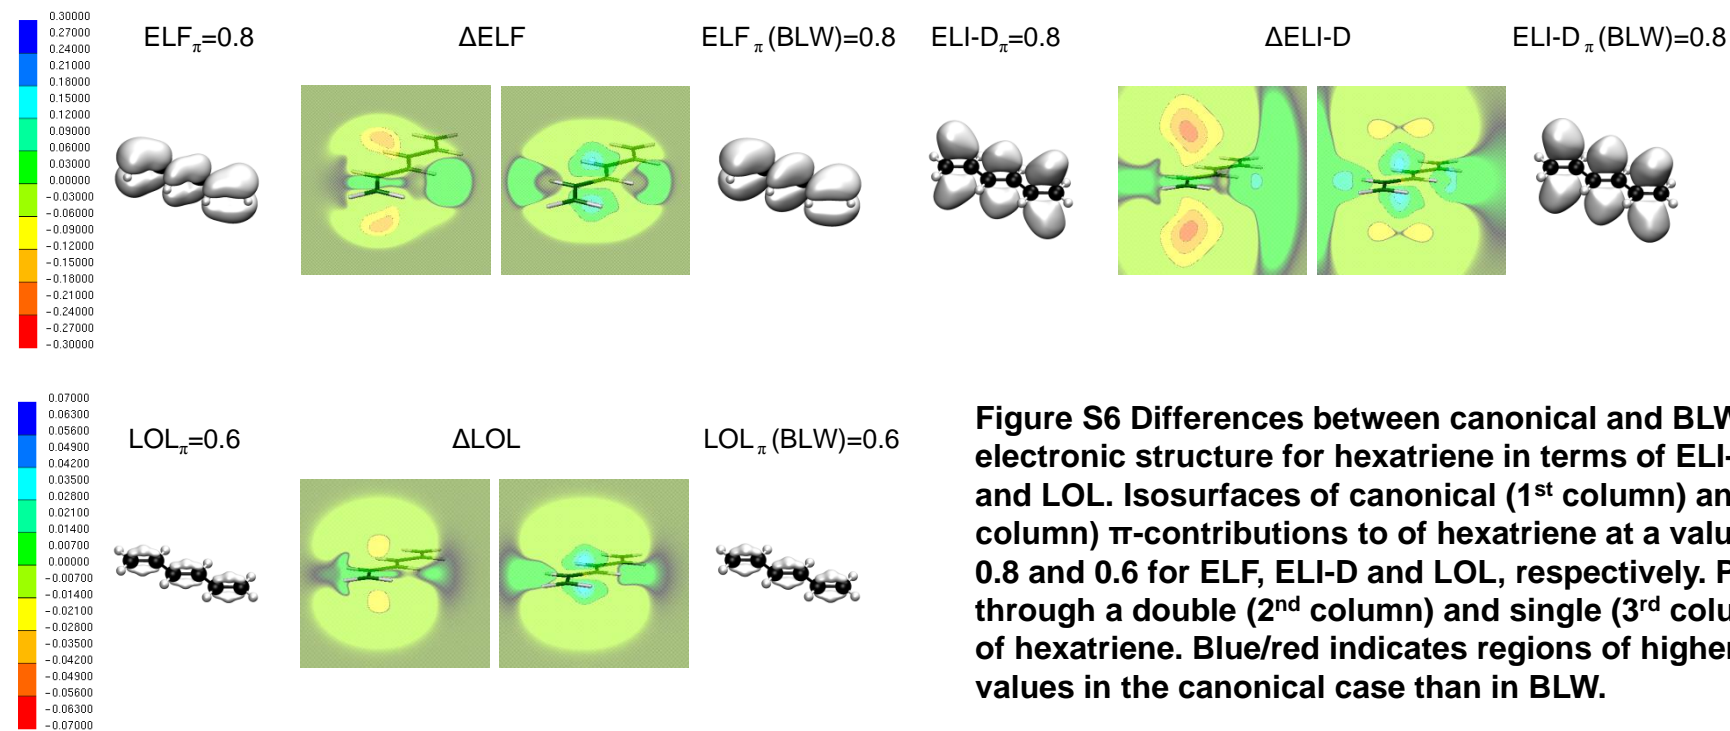

**Figure S6 Differences between canonical and BLW electronic structure for hexatriene in terms of ELI-D, ELF and LOL. Isosurfaces of canonical (1<sup>st</sup> column) and BLW (4<sup>th</sup> column)  $\pi$ -contributions to of hexatriene at a value of 0.8, 0.8 and 0.6 for ELF, ELI-D and LOL, respectively. Profiles through a double (2<sup>nd</sup> column) and single (3<sup>rd</sup> column) bond of hexatriene. Blue/red indicates regions of higher/lower values in the canonical case than in BLW.**

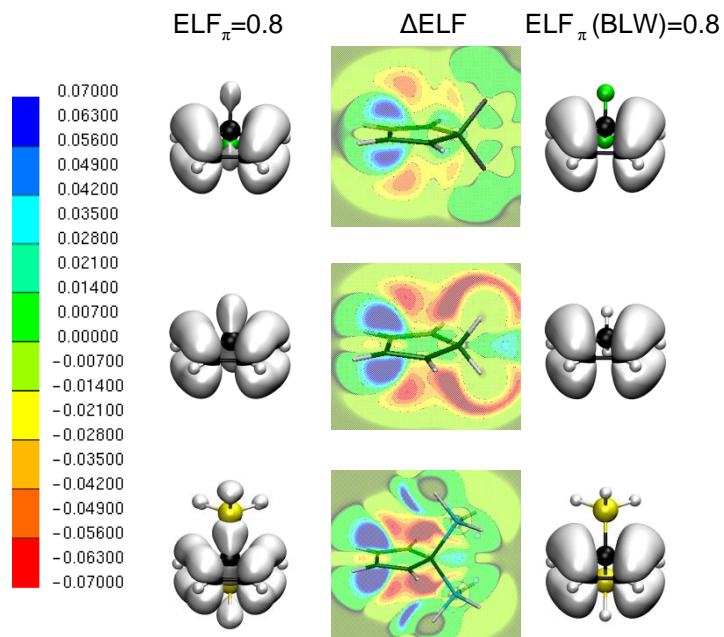

**Figure S7** ELF differences between canonical and BLW electronic structure for  $C_5H_4F_2$ ,  $C_5H_6$  and  $C_5H_4(SiH_3)_2$  and borazine. Isosurfaces of canonical (1<sup>st</sup> column) and BLW (3<sup>rd</sup> column)  $\pi$ -contributions at a value of 0.8 for ELF. Profiles perpendicular to the  $\pi$ -system through the single bond. Blue/red indicates regions of higher/lower values in the canonical case than in BLW.
